# Supplementary material for: Exclusion of sulfide:quinone oxidoreductase from mitochondria causes Leigh-like disease in mice by impairing sulfide metabolism
Source: JCI journal article supplement (doi:10.1172/jci170994), 2024-06-13
Supplement: sd1 [file 1]

## Supplemental Figure 1

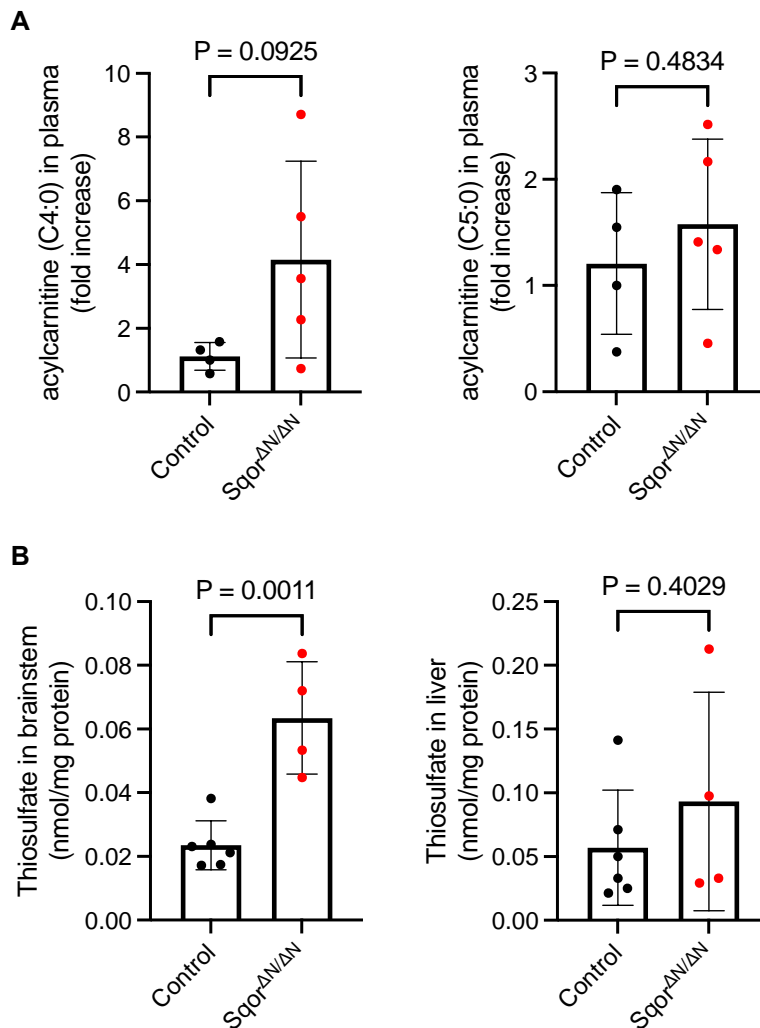

**Figure S1. Measurement of blood C4 and C5 acylcarnitines and thiosulfate in brainstem and liver of Sqor<sup>ΔN/ΔN</sup> mice.**

(A) C4 and C5 acylcarnitines in plasma of Sqor<sup>ΔN/ΔN</sup> mice were measured using LC-MS/MS and GC-MS/MS. Data were analyzed using t-test with Welch's correction for C4 acylcarnitine and t-test for C5 acylcarnitine. n = 4 to 5 mice for each group. Data are presented as means with standard deviation. (B) Thiosulfate in the brainstem and liver of Sqor<sup>ΔN/ΔN</sup> mouse was measured using LC-MS/MS. Data were analyzed using t-test. n = 4 to 6 mice for each group. Data are presented as means with standard deviation. Abbreviations: DMSO, dimethyl sulfoxide; GC-MS/MS, gas chromatography-tandem mass spectrometry; LC-MS/MS, liquid chromatography-tandem mass spectrometry.



## Supplemental Figure 2

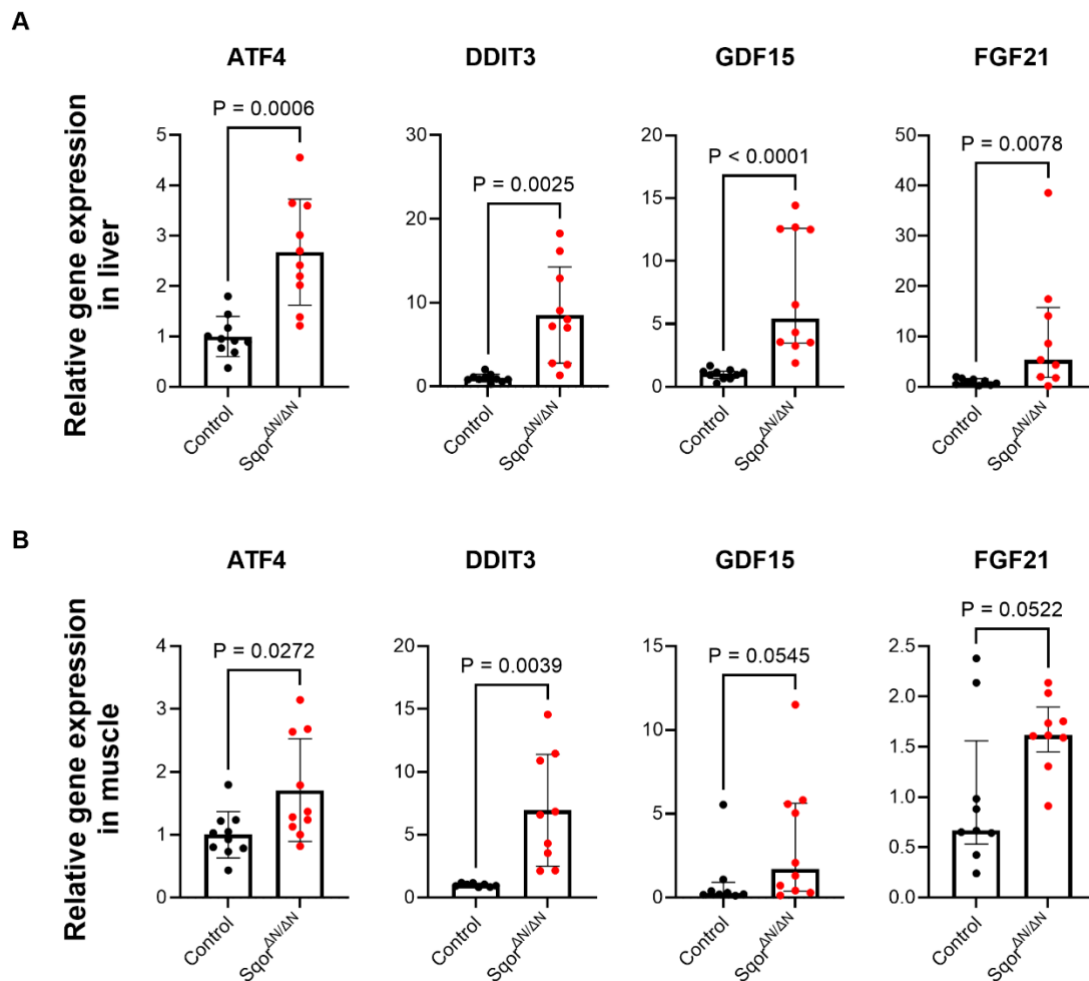

**Figure S2. Integrated stress response was triggered by mutations in *Sqor*<sup>ΔN/ΔN</sup> mouse.**

The mRNA levels of ATF4, DDIT3, GDF15, and FGF21 were measured using liver (A) and muscle (B) of *Sqor*<sup>ΔN/ΔN</sup> mice. Data were analyzed using t-test for ATF4 and DDIT3 and Mann-Whitney test for GDF15 and FGF21. n = 8 to 10 mice for each group. Data are presented as means with standard deviation for ATF4 and DDIT3, and as medians with interquartile range for GDF15 and FGF21. Abbreviations: ATF4, activating transcription factor 4; DDIT3, DNA damage-inducible transcript three protein; FGF21, fibroblast growth factor 21; GDF15, growth/differentiation factor 15; mRNA, messenger RNA.

Supplemental Figure 3

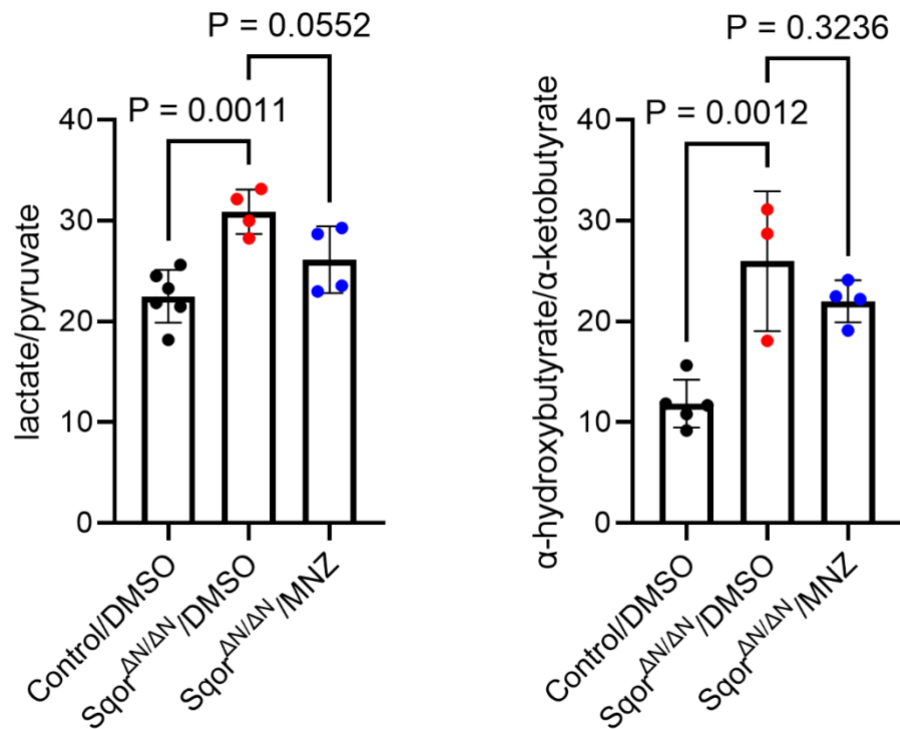

**Figure S3. NADH-reductive stress was induced by mutations in Sqr<sup>ΔN/ΔN</sup> mice.**

The concentrations of lactate, pyruvate, α-hydroxybutyrate, and α-ketobutyrate in plasma of Sqr<sup>ΔN/ΔN</sup> mice were measured by LC-MS/MS, and lactate/pyruvate ratio and α-hydroxybutyrate/α-ketobutyrate ratio were calculated. Data were analyzed using one-way ANOVA with Dunnett's multiple comparisons test. n = 3 to 6 mice for each group. Data are presented as means with standard deviation. Abbreviations: DMSO, dimethyl sulfoxide; LC-MS/MS, liquid chromatography-tandem mass spectrometry; MNZ, metronidazole.

## Supplemental Figure 4

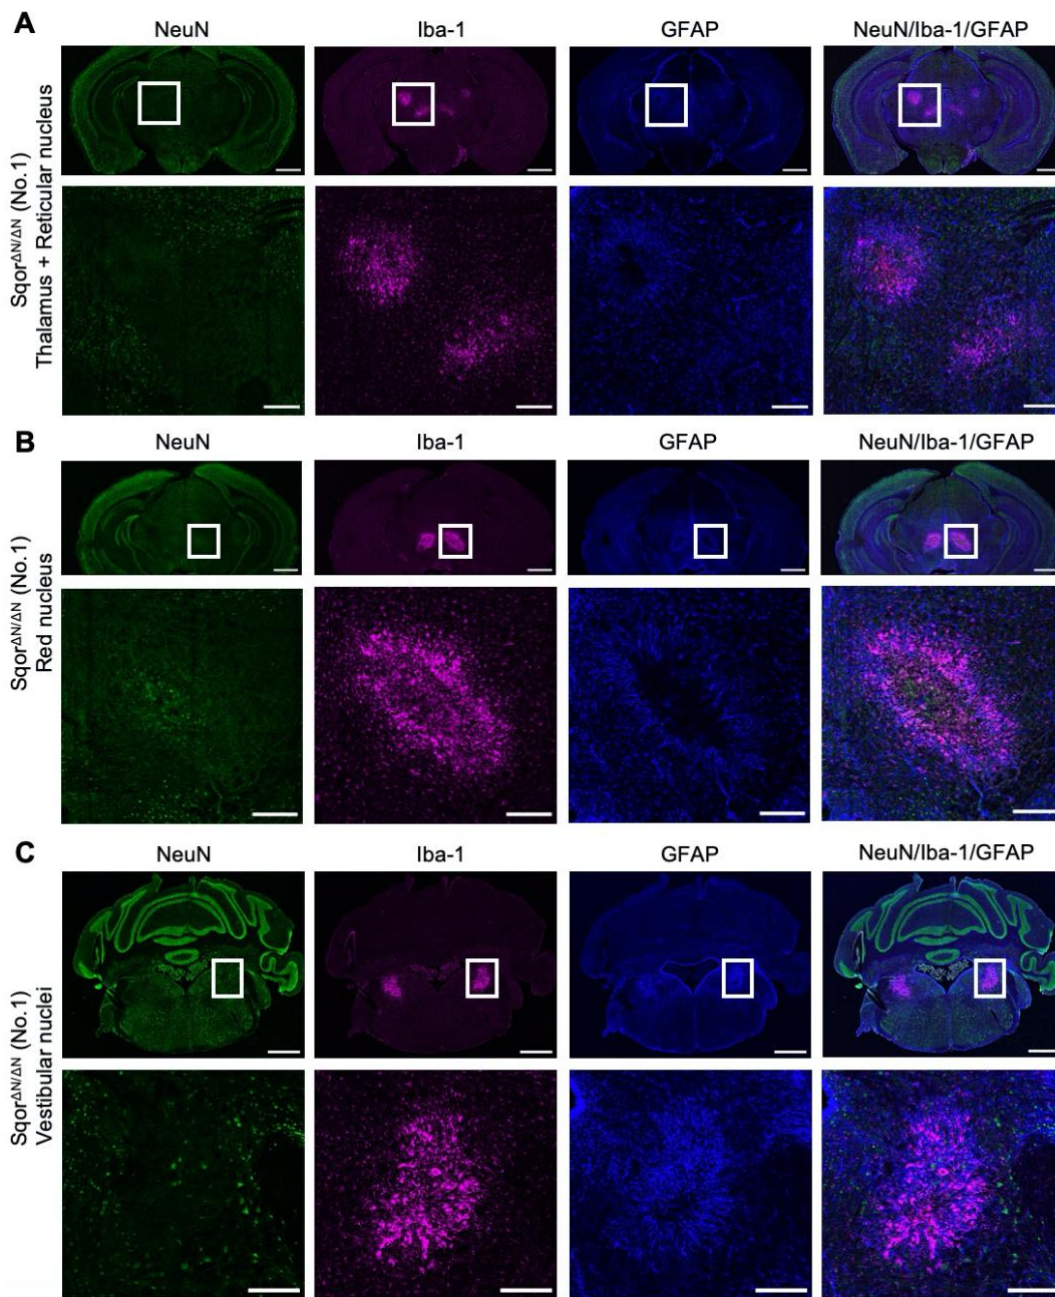

**Figure S4. Results of NeuN, Iba-1, and GFAP immunohistochemical staining in  $Sqr^{\Delta N/\Delta N}$  mouse No.1.**

The portions of the thalamus and reticular nucleus (A), red nucleus (B), and vestibular nuclei (C) of  $Sqr^{\Delta N/\Delta N}$  mouse No.1 that were indicated in the brain MRI scans were used for immunohistochemical staining. Staining for NeuN, Iba-1, and GFAP was performed to evaluate neurodegeneration and gliosis. An enlargement of the boxed regions is provided below each cross-section. Scale bar = 1000  $\mu$ m

in low magnification images and 250  $\mu\text{m}$  in high magnification images.

Abbreviations: GFAP, glial fibrillary acidic protein; Iba-1, ionized calcium-binding adaptor molecule 1; NeuN, neuronal nuclei.

## Supplemental Figure 5

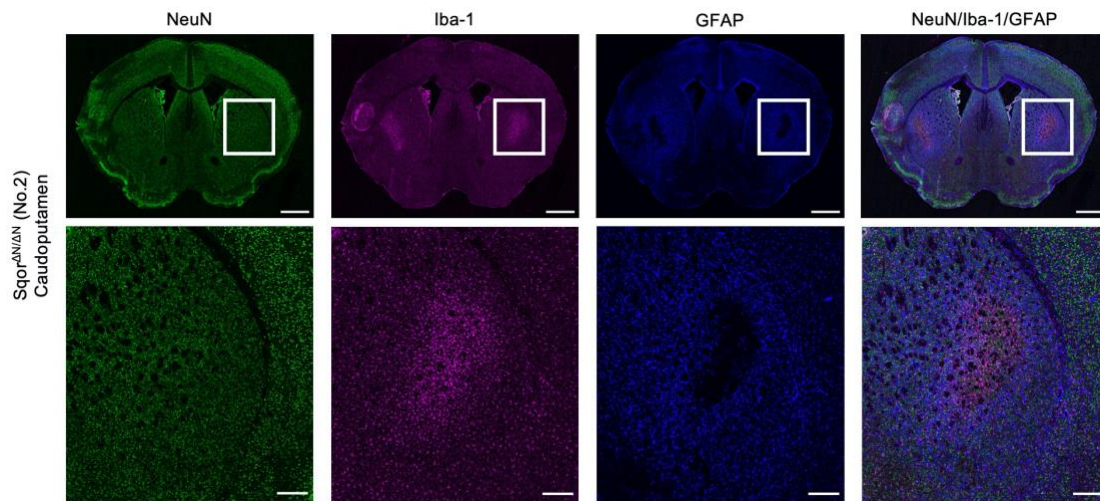

**Figure S5. Results of NeuN, Iba-1, and GFAP immunohistochemical staining in  $Sqor^{\Delta N/\Delta N}$  mouse No.2.**

The portions of the caudoputamen of  $Sqor^{\Delta N/\Delta N}$  mouse No.2 that were indicated in the brain MRI scans were used for immunohistochemical staining. Staining for NeuN, Iba-1, and GFAP was performed to evaluate neurodegeneration and gliosis. An enlargement of the boxed regions is provided below each cross-section. Scale bar = 1000  $\mu\text{m}$  in low magnification images and 250  $\mu\text{m}$  in high magnification images.

Abbreviations: GFAP, glial fibrillary acidic protein; Iba-1, ionized calcium-binding adaptor molecule 1; NeuN, neuronal nuclei.

Supplemental Figure 6

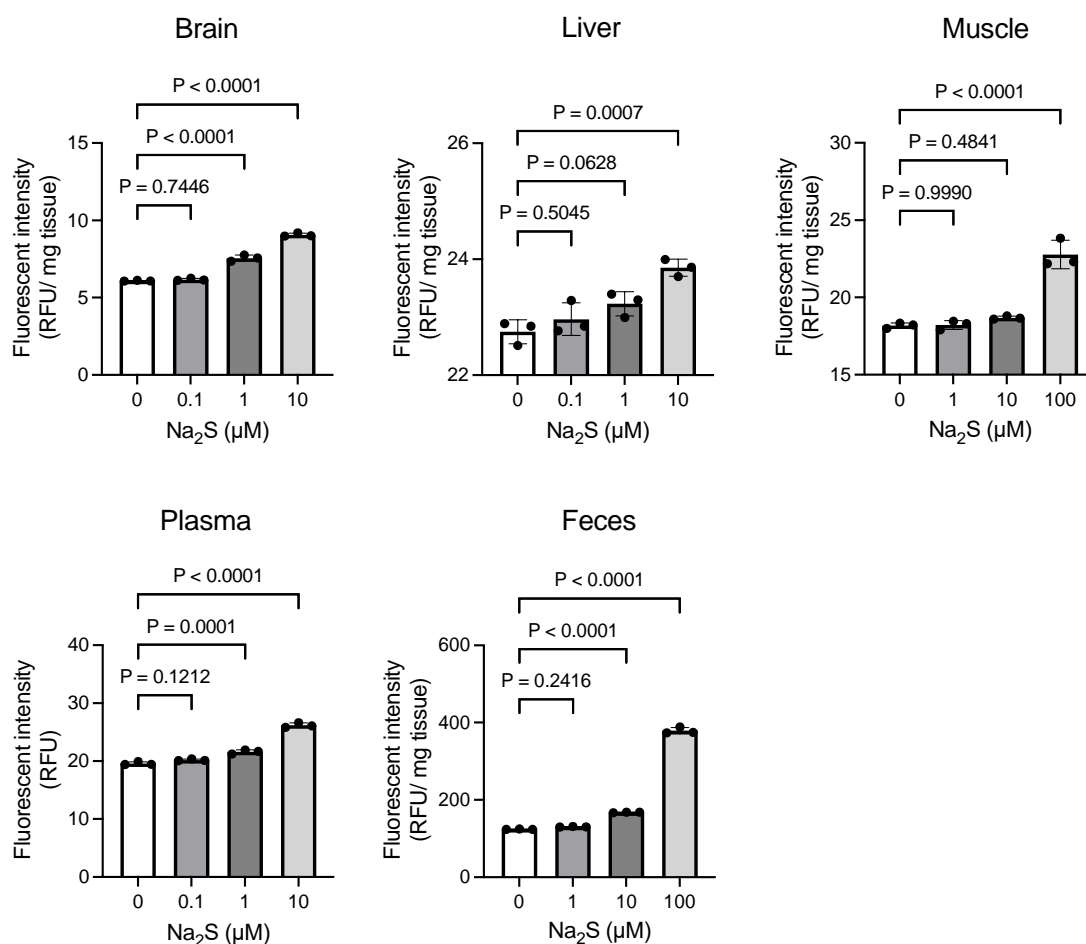

**Figure S6. Dose-dependent increase of HSip-1 fluorescent intensities in response to exogenously added Na<sub>2</sub>S.**

Fluorescent intensities at the wavelength of  $\lambda_{ex}/\lambda_{em} = 491 \text{ nm}/516 \text{ nm}$  in HSip-1 solution with brain, liver, muscle, plasma, or feces incubated with vehicle or Na<sub>2</sub>S. Data were analyzed using one-way ANOVA with Dunnett's multiple comparisons test.  $n = 3$  for each group. Data are presented as means with standard deviation.

Abbreviations: Na<sub>2</sub>S, sodium sulfide; RFU, relative fluorescence unit.



Supplementary Table

| <b>Parameter</b>  |          |          |
|-------------------|----------|----------|
| Polarity          | Positive | Negative |
| Ion spray voltage | 4,300    | -4,300   |
| Curtain gas       | 40       | 40       |
| Collision gas     | 12       | 12       |
| Temperature       | 475      | 475      |
| Ion source gas 1  | 30       | 30       |
| Ion source gas 2  | 50       | 50       |

**Supplementary Table. Parameters of turbo spray ionization**
